# Supplementary material for: Melanoma Cells Break Down LPA to Establish Local Gradients That Drive Chemotactic Dispersal
Source: PubMed Central journal article supplement (PMC4196730; doi:10.1371/journal.pbio.1001966), 2014-10-14

Muinonen-Martin et al. Supplementary figure 2

A:

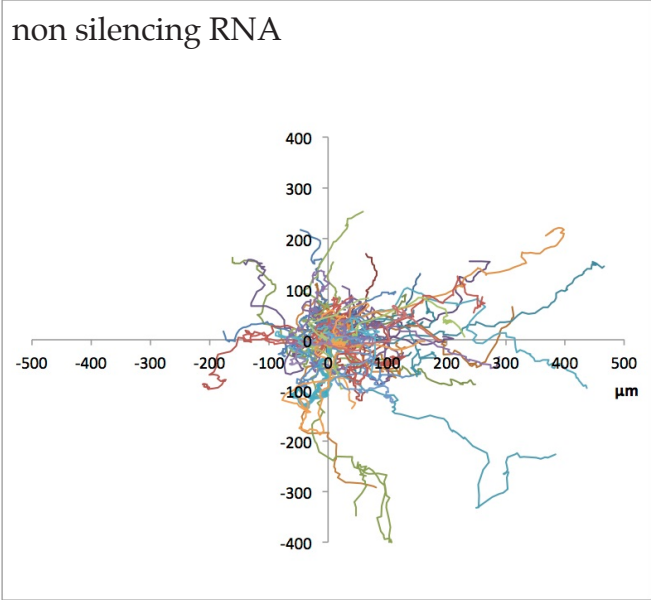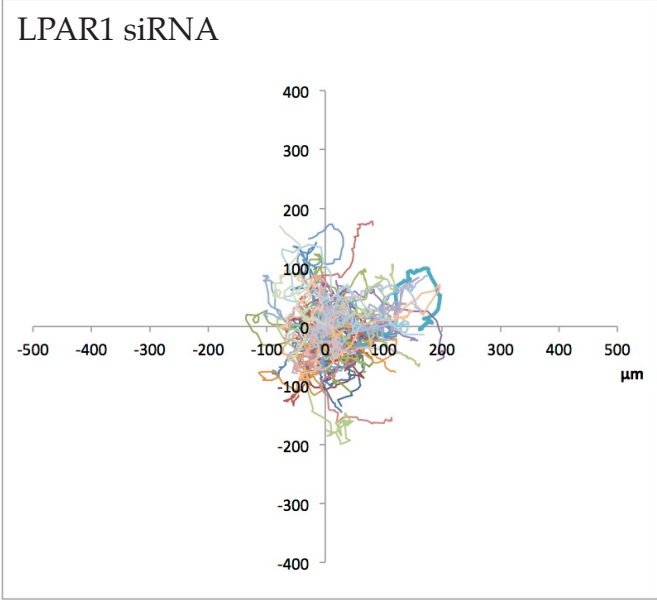

B:

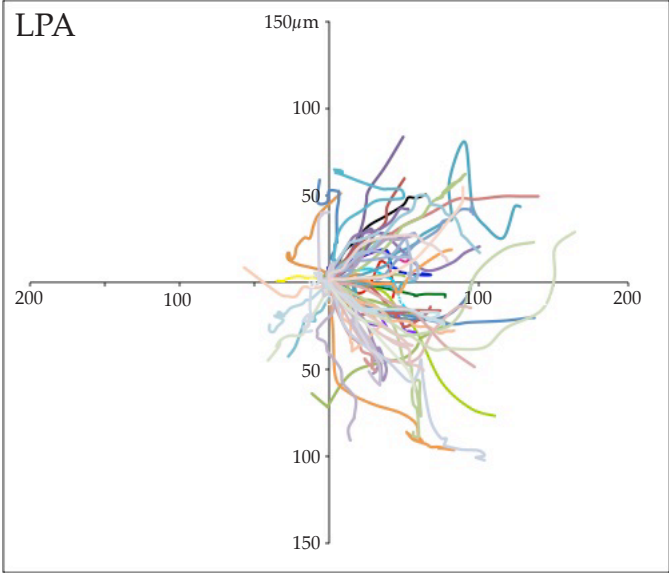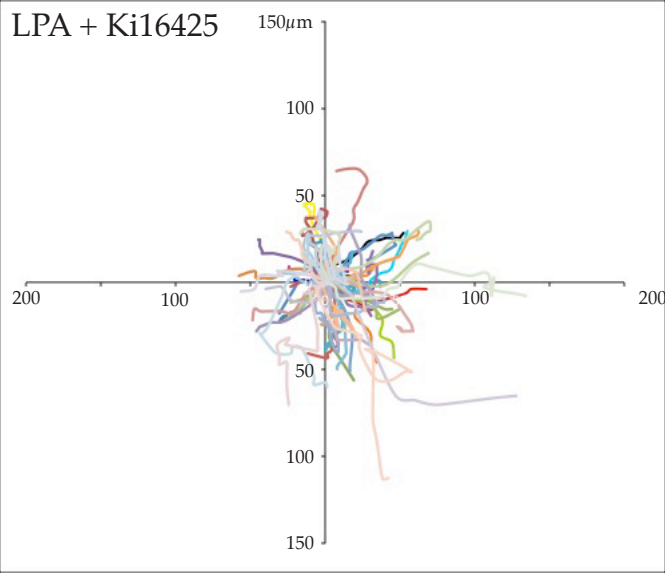

Supplement: pbio.1001966.s002.pdf [file pbio.1001966.s002.pdf]
